# Supplementary material for: The co-operative performance of a hydrated salt assisted sponge like P(VDF-HFP) piezoelectric generator: an effective piezoelectric based energy harvester
Source: Royal Society of Chemistry journal article supplement (doi:10.1039/c4cp05513f), 2015-01-01
Supplement: c4cp05513f1.pdf [file c4cp05513f1.pdf]

Electronic Supplementary Information (ESI)

**The Co-operative Performance of Hydrated Salt Assisted Sponge like P(VDF-HFP) Piezoelectric Generator: An Effective Piezoelectric Based Energy Harvester**

Prakriti Adhikary, Samiran Garain, and Dipankar Mandal\*

Organic Nano-Piezoelectric Device Laboratory, Department of Physics, Jadavpur University,  
Kolkata 700032, India

**\*Corresponding Author**

E-mail: dipankar@phys.jdvu.ac.in; Fax: +91-33-2413-8917; Tel: +91-94333-73530

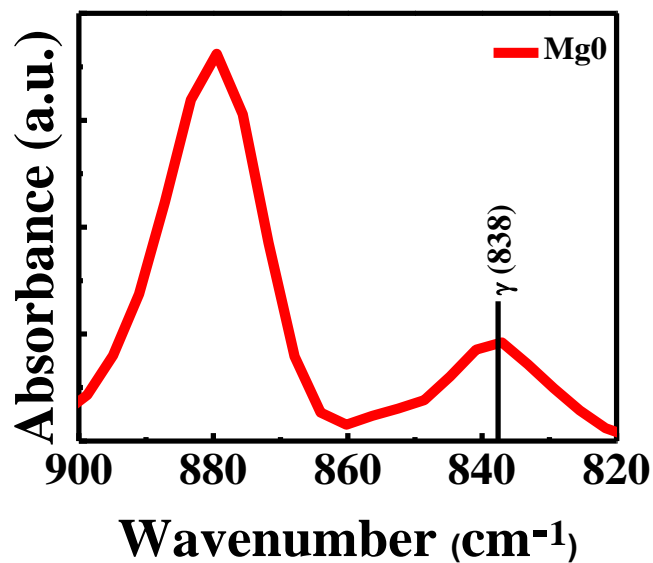

Fig. S1 FT-IR spectra of Mg<sub>0</sub> film from 900-820 cm<sup>-1</sup>.

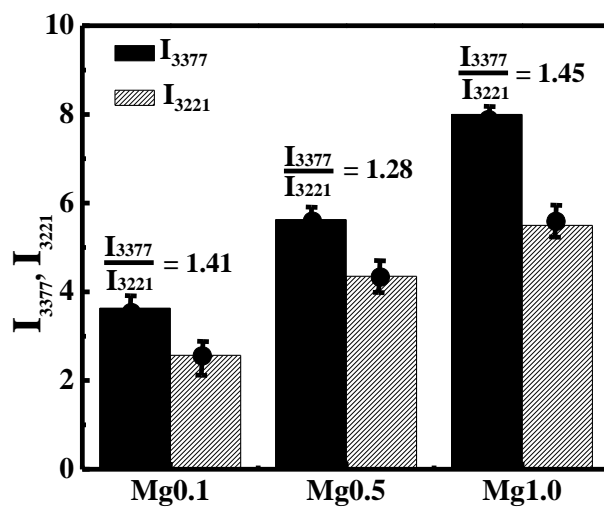

Fig. S2 Intensities of peak at 3377 cm<sup>-1</sup> and 3221 cm<sup>-1</sup> changes with increasing Mg-salt concentration. The corresponding intensity ratios are shown in the inset.

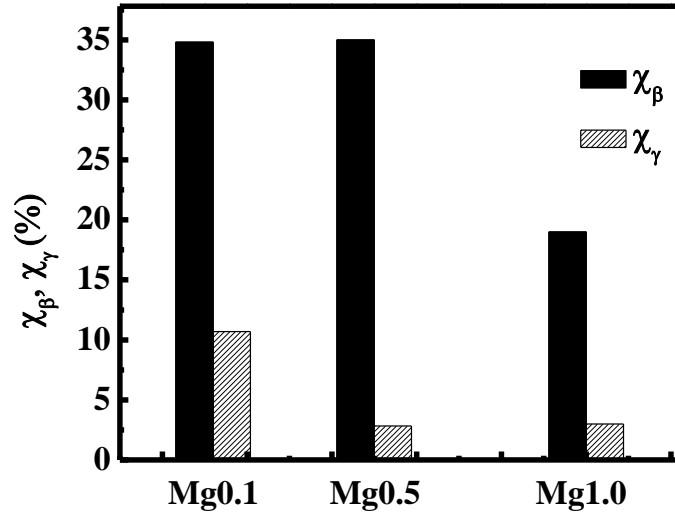

**Fig. S3** Degree of  $\beta$ - and  $\gamma$ - crystallinity<sup>‡</sup> for different concentration of Mg-salt filler utilized P(VDF-HFP) films.

<sup>‡</sup>The degree of  $\beta$ - crystallinity ( $\chi_{\beta}$ ) and  $\gamma$ - crystallinity ( $\chi_{\gamma}$ ) are calculated by the following equations (eqn S1 and S2)

$$\chi_{\beta} = \chi_c \times \left( \frac{A_{\beta}}{A_{\beta} + A_{\gamma}} \right) \times 100\% \quad (\text{S1})$$

$$\chi_{\gamma} = \chi_c \times \left( \frac{A_{\gamma}}{A_{\beta} + A_{\gamma}} \right) \times 100\% \quad (\text{S2})$$

where,  $A_{\beta}$  and  $A_{\gamma}$  indicate the total integral area from  $\beta$ - and  $\gamma$ -crystalline phases peaks respectively.

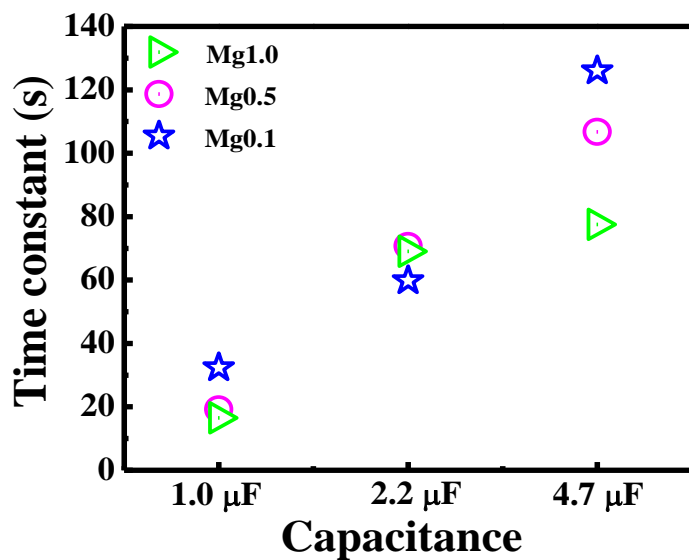

**Fig. S4** Time constant for the capacitors (e.g., 1, 2.2, and 4.7  $\mu\text{F}$ ) for each FPG fabricated with different Mg# films.

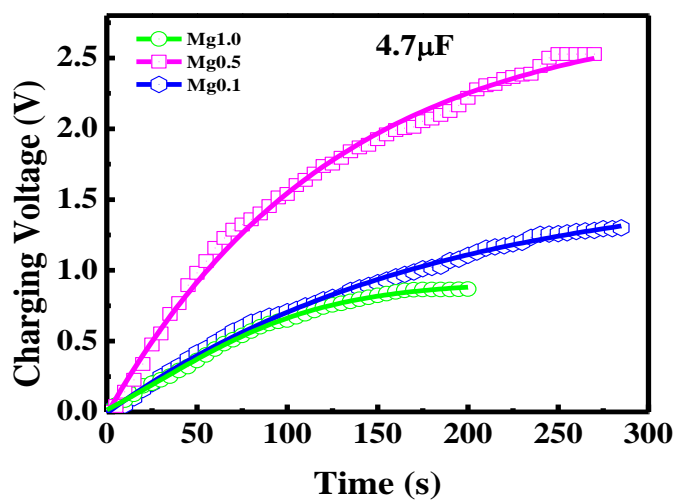

**Fig. S5** Capacitor charging performance ( $C = 4.7 \mu\text{F}$ ) with FPG made with Mg# films (#: 0.1, 0.5 and 1.0).

**Table S1** Power stored in capacitor ( $C=4.7\mu\text{F}$ ) from different FPGs, fabricated with different Mg# films. The calculation was performed based on the Fig. S5.

| <b>FPG made with the following films</b> | <b>Stored Power (nW) in Capacitor (<math>C=4.7\ \mu\text{F}</math>)</b> |
|------------------------------------------|-------------------------------------------------------------------------|
| <b>Mg0.1</b>                             | 14.0                                                                    |
| <b>Mg0.5</b>                             | 58.8                                                                    |
| <b>Mg1.0</b>                             | 8.5                                                                     |
